# Supplementary material for: Detection and Tracking of NY-ESO-1-Specific CD8+ T Cells by High-Throughput T Cell Receptor β (TCRB) Gene Rearrangements Sequencing in a Peptide-Vaccinated Patient
Source: PubMed Central journal article supplement (PMC4546392; doi:10.1371/journal.pone.0136086), 2015-08-20
Supplement: pone.0136086.s001.pdf [file pone.0136086.s001.pdf]

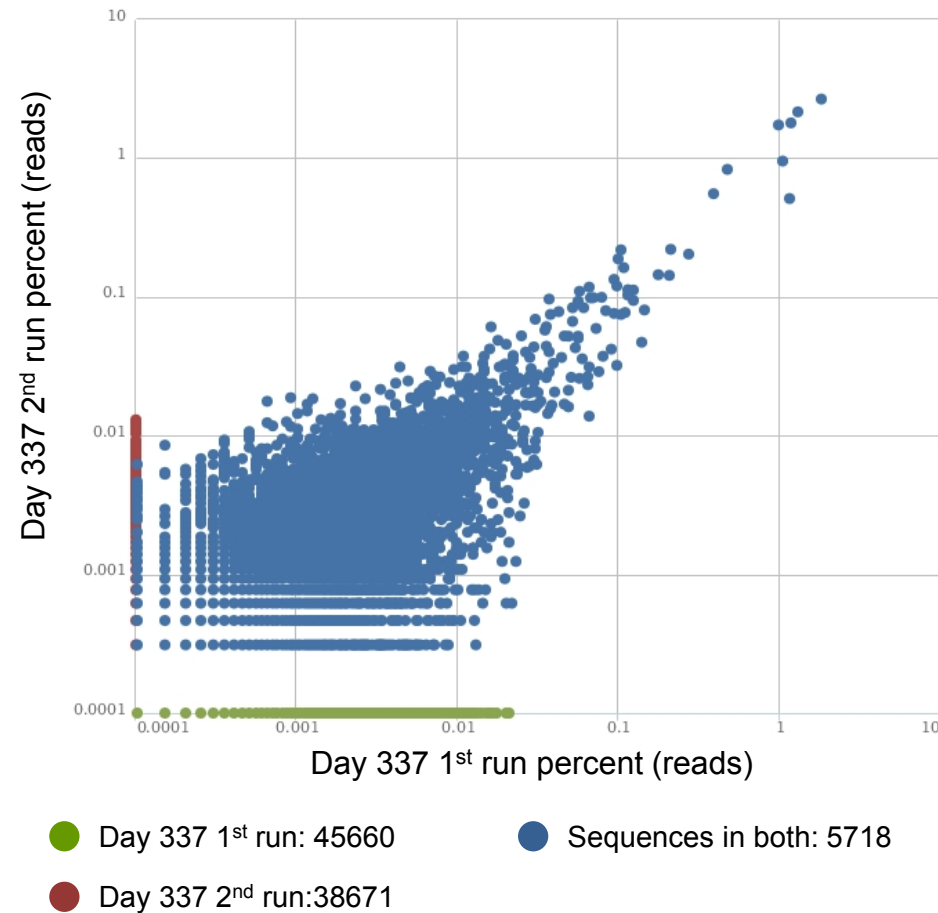

**Supplementary Figure 1. Reproducibility of TCRVB CDR3 analysis.** To illustrate the reproducibility of the assay, we performed sequencing two separate PCR reactions performed using template from the same DNA extraction (Sample Day 337). Each point represents a single unique CDR3 sequence, plotted according to the relative frequency (%) in this log–log scatter plot. Clonotypes that were found in only one subset were assigned an arbitrary frequency value 0.0001 for graphical purposes. (linear regression,  $R=0.950$ ,  $R^2 = 0.902$ )
